# Supplementary material for: Geostatistical upscaling of rain gauge data to support uncertainty analysis of lumped urban hydrological models
Source: Copernicus journal article supplement (doi:10.5194/hess-21-1077-2017), 2017-02-20
Supplement: Supplementary file 1 [file hess-21-1077-2017-supplement.pdf]

Supplement of Hydrol. Earth Syst. Sci., 21, 1077–1091, 2017  
<http://www.hydrol-earth-syst-sci.net/21/1077/2017/>  
doi:10.5194/hess-21-1077-2017-supplement  
© Author(s) 2017. CC Attribution 3.0 License.

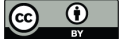

*Supplement of*

## **Geostatistical upscaling of rain gauge data to support uncertainty analysis of lumped urban hydrological models**

**Manoranjan Muthusamy et al.**

*Correspondence to:* Manoranjan Muthusamy (m.muthusamy@sheffield.ac.uk)

The copyright of individual parts of the supplement might differ from the CC-BY 3.0 licence.

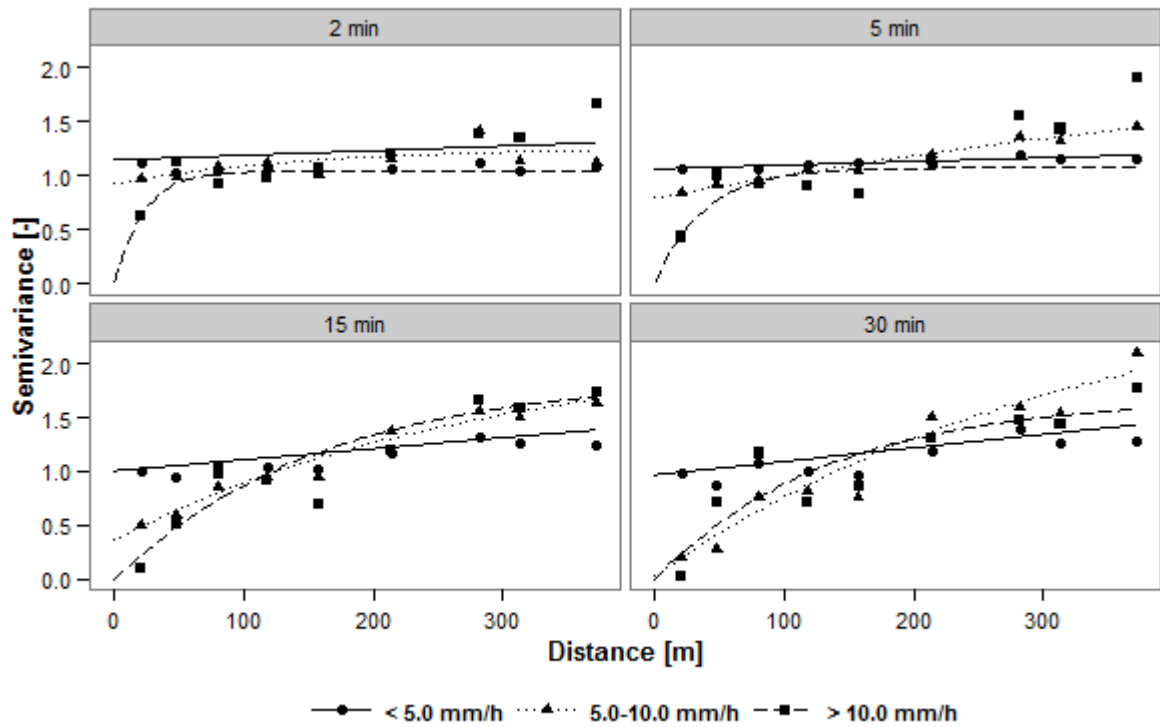

Figure S1: Calculated variograms for each intensity class within each temporal averaging interval using randomly selected 80% of the data

5

Table S1: Summary of computational power required for spatial stochastic simulation.

| Computer used                             | Area (m <sup>2</sup> ) | Grid size (m <sup>2</sup> ) | number of simulations | Computational time per time instant (s) |
|-------------------------------------------|------------------------|-----------------------------|-----------------------|-----------------------------------------|
| Core i5, 1.7 GHz, 4 processors , 8 GB RAM | 200 × 400*             | 25 × 25*                    | 500*                  | 10*                                     |
|                                           | 200 × 400              | 25 × 25                     | 1000                  | 20                                      |
|                                           | 200 × 400              | 10 × 10                     | 500                   | 60                                      |

\*This configuration is used in this study.

10
